# Supplementary material for: The Effect of Systemic Parameters and Baseline Characteristics in Short-Term Response Analysis with Intravitreal Ranibizumab in Treatment-Naive Patients with Neovascular Age-Related Macular Degeneration
Source: MDPI journal article supplement (doi:10.3390/pharmaceutics16010105), 2024-01-13
Supplement: s1 [file s1]

# Supplementary material: The effect of systemic parameters and baseline characteristics in short-term response analysis with intravitreal ranibizumab in treatment-naïve patients with neovascular age related macular degeneration

Laura García-Quintanilla<sup>1,2,3†</sup>, Pablo Almuiña-Varela<sup>2,4†</sup>, María José Rodríguez-Cid<sup>4</sup>, María Gil-Martínez<sup>4</sup>, Maximino J Abal<sup>4,5,6</sup>, Francisco Gomez-Ulla<sup>5</sup>, Miguel González-Barcia<sup>1,2</sup>, Cristina Mondelo-García<sup>1,2</sup>, Ana Estany-Gestal<sup>7</sup>, Francisco J Otero-Espinar<sup>3</sup>, Maribel Fernández-Rodríguez<sup>4,5,6\*</sup>, Anxo Fernández-Ferreiro<sup>1,2\*</sup>

Table S1. Clinical parameters analysed by sex

|                               | Total<br>(n=44) | Women<br>(n= 26) | Men<br>(n= 18) | p-value |
|-------------------------------|-----------------|------------------|----------------|---------|
| <b>Response parameters</b>    |                 |                  |                |         |
| AV (ETDRS)                    |                 |                  |                |         |
| Basal                         | 60, (45-70)     | 63, (49-70)      | 54, (39-68)    | 0.303   |
| Treated                       | 66, (55-75)     | 66, (55-75)      | 67, (50-73)    | 0.807   |
| wilcoxon                      |                 | 0.057            | 0.003          |         |
| CRT (µm)                      |                 |                  |                |         |
| Basal                         | 298, (260-354)  | 288, (246-347)   | 318, (274-370) | 0.214   |
| Treated                       | 214, (194-250)  | 206, (193-242)   | 232, (204-256) | 0.170   |
| wilcoxon                      | 0.001           | 0.001            | 0.001          |         |
| IRF (N,%)                     |                 |                  |                |         |
| Basal                         | 27, 61.4        | 16, 61.5         | 11, 61.1       | 0.977   |
| Treated                       | 8, 18.1         | 6, 23.1          | 2, 11.1        | 0.425   |
| SRF (N,%)                     |                 |                  |                |         |
| Basal                         | 33, 75.0        | 20, 76.9         | 13, 72.3       | 0.894   |
| Treated                       | 9, 20.5         | 7, 26.9          | 2, 11.1        | 0.270   |
| SubRPE (N,%)                  |                 |                  |                |         |
| Basal                         | 30, 48.2        | 22, 84.6         | 8, 44.4        | 0.018   |
| Treated                       | 13, 29.5        | 11, 42.3         | 2, 11.1        | 0.043   |
| <b>Biochemical parameters</b> |                 |                  |                |         |
| Uric acid (mg/dL)             |                 |                  |                |         |
| Basal                         | 5.1, (3.8-6.0)  | 4.3, (3.7-5.3)   | 5.7, (5.0-6.8) | 0.008   |
| Treated                       | 4.9, (3.9-6.2)  | 4.4, (3.5-5.7)   | 5.8, (4.7-6.3) | 0.031   |
| wilcoxon                      | 0.001           | 0.102            | 0.456          |         |

Parameters: Median, IQR: interquartile range. CRT: central retinal thickness, ETDRS: Early Treatment Diabetic Retinopathy Study, IRF: Intraretinal fluid, SRF: subretinal fluid, RPE: retinal pigment epithelium, VA: Visual Acuity

**Table S2. Biochemical parameters analysed by treatment response**

|                           | Total<br>(N=44)   | Poor responders<br>N= 20 | Good responders<br>N= 24 | p-<br>value |
|---------------------------|-------------------|--------------------------|--------------------------|-------------|
| <b>Urea (mg/dL)</b>       |                   |                          |                          |             |
| Basal                     | 44, (35-54)       | 42, (30-52)              | 46, (35-62)              | 0.212       |
| Treated                   | 43, (35-59)       | 43, (32-56)              | 46, (38-63)              | 0.339       |
| Wilcoxon                  | 0.567             | 0.749                    | 0.558                    |             |
| <b>Uric Acid (mg/dL)</b>  |                   |                          |                          |             |
| Basal                     | 5.1, (3.8-6.0)    | 4.5, (3.7-5.1)           | 5.7, (4.3-6.5)           | 0.007       |
| Treated                   | 4.9, (3.9-6.2)    | 4.4, (3.9-5.7)           | 5.8, (3.7-6.6)           | 0.071       |
| Wilcoxon                  | 0.516             | 0.618                    | 0.254                    |             |
| <b>Creatinine (mg/dL)</b> |                   |                          |                          |             |
| Basal                     | 0.91, (0.72-1.07) | 0.79, (0.66-0.97)        | 0.94, (0.82-1.16)        | 0.014       |
| Treated                   | 0.96, (0.72-1.08) | 0.88, (0.68-1.01)        | 0.96, (0.82-1.14)        | 0.161       |
| Wilcoxon                  | 0.321             | 0.286                    | 0.685                    |             |
| <b>Cholesterol</b>        |                   |                          |                          |             |
| Basal                     | 188, (163-216)    | 191, (161-238)           | 186, (164-194)           | 0.385       |
| Treated                   | 176, (162-200)    | 175, (150-203)           | 176, (162-190)           | 0.981       |
| Wilcoxon                  | 0.022             | 0.015                    | 0.070                    |             |
| <b>Triglycerides</b>      |                   |                          |                          |             |
| Basal                     | 105, (71-145)     | 110, (71-154)            | 93, (70-116)             | 0.471       |
| Treated                   | 93, (55-146)      | 109, (54-157)            | 93, (69-132)             | 0.479       |
| Wilcoxon                  |                   | 0.687                    | 0.484                    |             |

Parameters: median, IQR. Reference range: Urea: 12-44 mg/dL; UA: 3,5-7,2 mg/dL, creatinine: 0,63-1,13 mg/dL;

**Table S3. Inflammatory parameters results analysed by treatment response**

|                                      | Total<br>N=44        | Poor responders<br>N= 20 | Good responders<br>N= 24 | p-<br>value |
|--------------------------------------|----------------------|--------------------------|--------------------------|-------------|
| <b>WBC (x10<sup>3</sup>)</b>         |                      |                          |                          |             |
| Basal                                | 6.92, (5.44-7.70)    | 6.99, (5.62-8.72)        | 6.81, (5.28-7.60)        | 0.346       |
| Treated                              | 6.22, (5.20-6.93)    | 6.32, (5.09-6.68)        | 6.10, (5.20-7.01)        | 0.689       |
| wilcoxon                             | 0.028                | 0.030                    | 0.290                    |             |
| <b>Neutrophils (x10<sup>3</sup>)</b> |                      |                          |                          |             |
| Basal                                | 4.48, (3.49-5.44)    | 4.60, (3.44-6.22)        | 4.08, (3.54-5.16)        | 0.493       |
| Treated                              | 3.73, (3.30-4.63)    | 3.60, (2.85-4.31)        | 4.00, (3.33-4.78)        | 0.328       |
| wilcoxon                             | 0.012                | 0.044                    | 0.141                    |             |
| <b>CRP (mg/dL)</b>                   |                      |                          |                          |             |
| Basal                                | 0.190, (0.120-0.410) | 0.212, (0.120-0.610)     | 0.190, (0.115-0.392)     | 0.864       |
| Treated                              | 0.190, (0.111-0.470) | 0.148, (0.087-0.556)     | 0.216, (0.122-0.395)     | 0.759       |
| wilcoxon                             | 0.599                | 0.904                    | 0.411                    |             |
| <b>ESR (mm)</b>                      |                      |                          |                          |             |
| Basal                                | 22, (10-38)          | 22, (16-28)              | 21, (9-40)               | 0.525       |
| Treated                              | 22, (11-34)          | 20, (12-28)              | 25, (9-36)               | 0.663       |
| wilcoxon                             | 0.487                | 0.212                    | 0.831                    |             |
| <b>B2M (mg/L)</b>                    |                      |                          |                          |             |

|                     |         |                    |                    |                    |       |
|---------------------|---------|--------------------|--------------------|--------------------|-------|
|                     | Basal   | 2.57, (2.00-3.35)  | 2.48, (1.98-3.20)  | 2.67, (1.99-3.69)  | 0.315 |
|                     | Treated | 2.44, (2.10-3.48)  | 2.39, (2.02-3.28)  | 2.50, (2.25-3.62)  | 0.406 |
| wilcoxon            |         | 0.407              | 0.201              | 0.954              |       |
| <b>TNF (pg/mL)</b>  |         |                    |                    |                    |       |
|                     | Basal   | 8.2, (7.0-10.8)    | 7.8, (6.8-10.55)   | 9.3, (6.7-12.1)    | 0.232 |
|                     | Treated | 7.4, (6.5-10.4)    | 7.2, (6.2-9.92)    | 9.1, (6.9-10.5)    | 0.154 |
| wilcoxon            |         | 0.645              | 0.408              | 0.773              |       |
| <b>rIL-2 (U/mL)</b> |         |                    |                    |                    |       |
|                     | Basal   | 466, (345-711)     | 475, (317-610)     | 461, (357-736)     | 0.715 |
|                     | Treated | 476, (345-719)     | 454, (328-660)     | 505, (362-830)     | 0.304 |
| wilcoxon            |         | 0.301              | 0.877              | 0.184              |       |
| <b>IL-6 (pg/mL)</b> |         |                    |                    |                    |       |
|                     | Basal   | 6.1, (4.2-8.2)     | 6.1, (3.7-9.9)     | 6.0, (4.3-8.2)     | 0.893 |
|                     | Treated | 5.4, (3.3-7.8)     | 5.2, (3.1-6.4)     | 5.6, (3.8-8.2)     | 0.215 |
| wilcoxon            |         | 0.422              | 0.107              | 0.728              |       |
| <b>IL-8 (pg/mL)</b> |         |                    |                    |                    |       |
|                     | Basal   | 22.0, (13.0-100.0) | 21.0, (13.0-100.0) | 24.0, (12.8-115.8) | 0.741 |
|                     | Treated | 33.0, (13.8-111.5) | 29.5, (12.2-81.0)  | 37.0, (14.0-117.5) | 0.480 |
| wilcoxon            |         | 0.102              | 0.546              | 0.092              |       |

Parameters: median, IQR. B2M: Beta-2-Microglobulin, CRP: C-reactive protein, ESR: erythrocyte sedimentation rate, TNF: tumor necrosis factor; WBC: white blood count.

Reference range: B2M: 1,09-2,53 mg/L; CRP: 0-0,5 mg/dL; ESR: 0-20 mm; rIL-2: 158-623 U/mL; IL-6: 0-5 pg/mL; IL-8: 0-62 pg/mL; TNF: 0-8,1 pg/mL.
